# Supplementary material for: Draft Genome Sequencing of Giardia intestinalis Assemblage B Isolate GS: Is Human Giardiasis Caused by Two Different Species?
Source: PubMed Central journal article supplement (PMC2723961; doi:10.1371/journal.ppat.1000560), 2009-08-21

WindowSize: 5000 bp ; Step size: 500 bp

WB-C6 CH991782

GS/M-H7 syntenic contigs

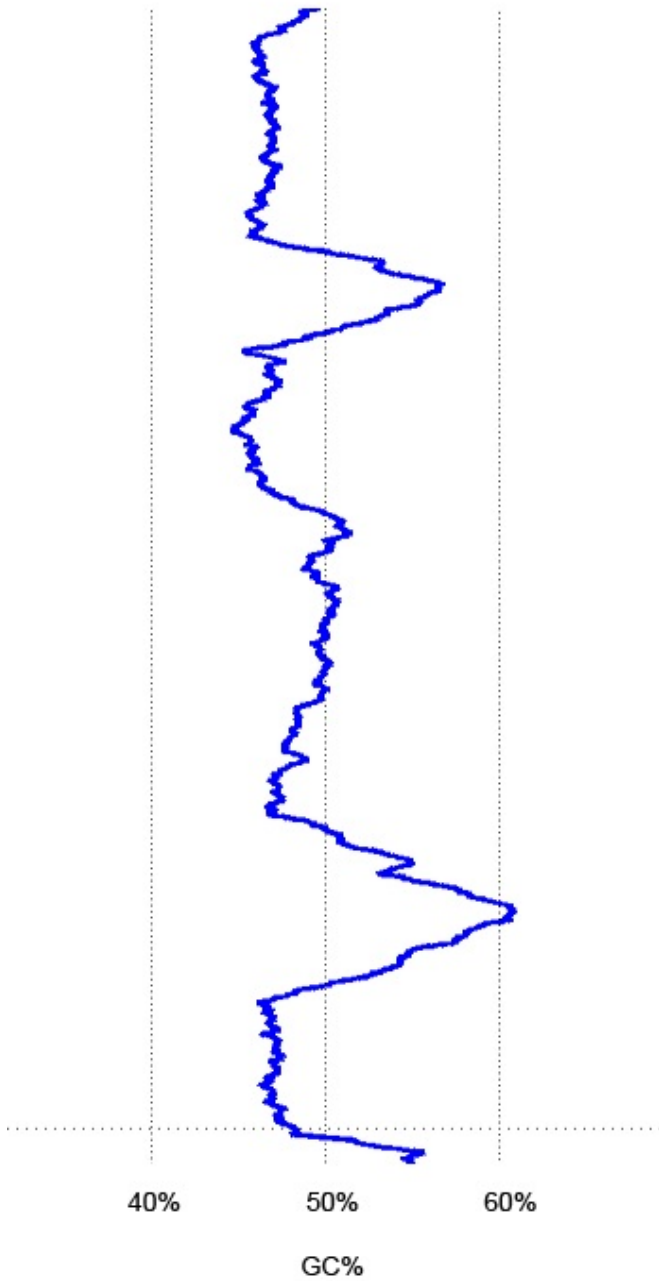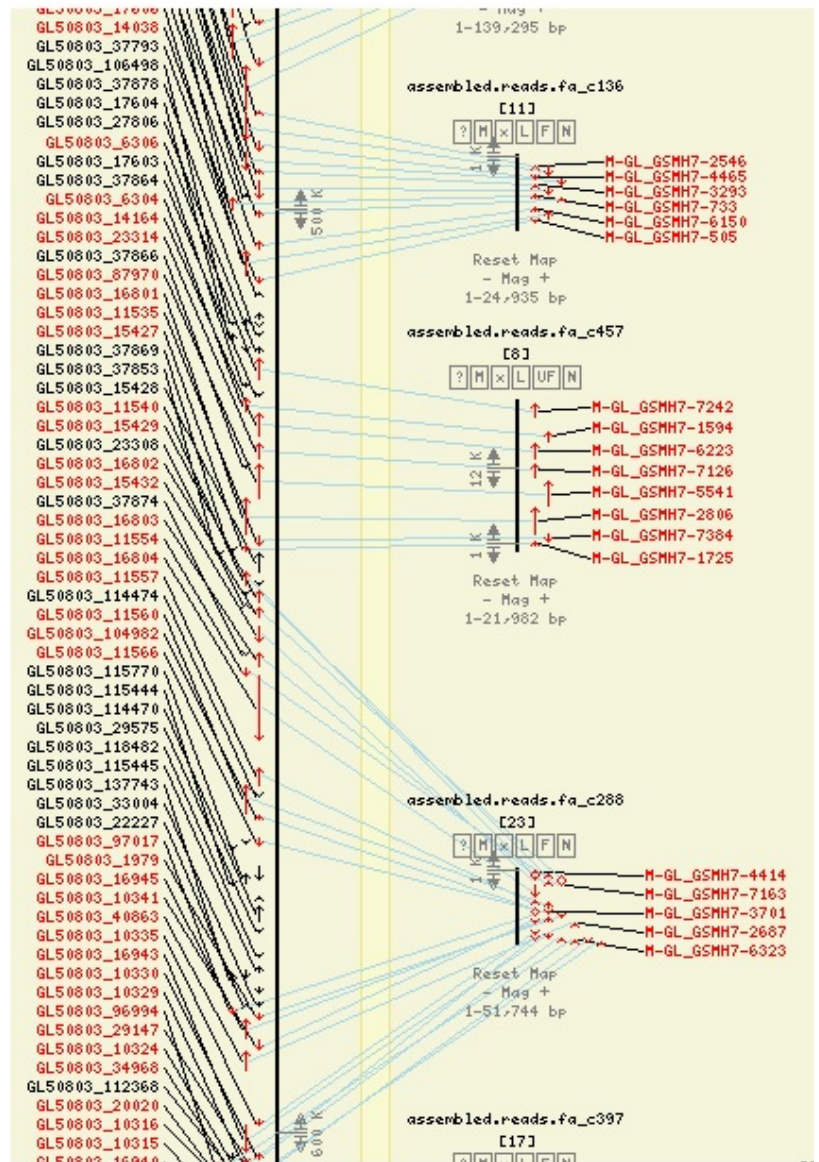

Supplement: ppat.1000560.s002.pdf [file ppat.1000560.s002.pdf]
