# Supplementary material for: Draft Genome Sequencing of Giardia intestinalis Assemblage B Isolate GS: Is Human Giardiasis Caused by Two Different Species?
Source: PubMed Central journal article supplement (PMC2723961; doi:10.1371/journal.ppat.1000560), 2009-08-21
Supplement: ppat.1000560.s003.pdf [file ppat.1000560.s003.pdf]

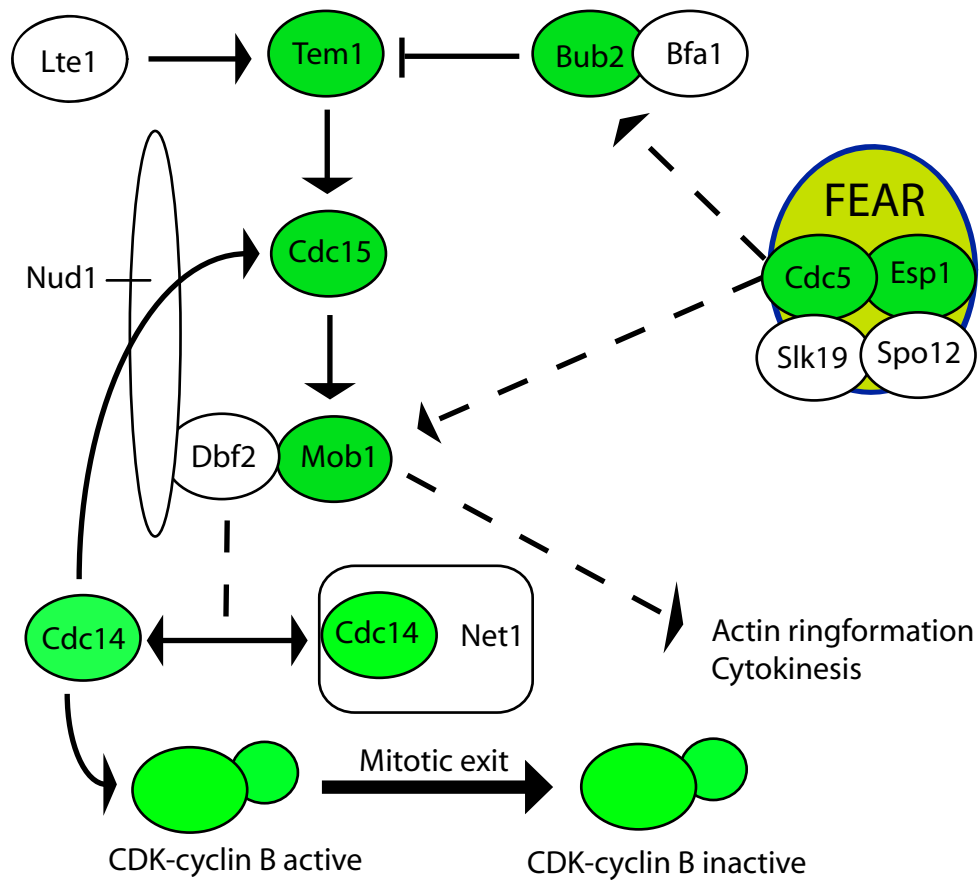

| <b>Protein</b>     | <b>WB-C6 ORF</b> |
|--------------------|------------------|
| Tem 1-like protein | GL50803_9778     |
| Bub2               | GL50803_15248    |
| Cdc15              | GL50803_16834    |
| Mob1               | GL50803_11044    |
| Mob1               | GL50803_4008     |
| Cdc14              | GL50803_9270     |
| Cdc5               | GL50803_16835    |
| Cdc5               | GL50803_104150   |
| Esp1               | GL50803_90767    |
| Cyclin B           | GL50803_3977     |
