# Supplementary material for: Draft Genome Sequencing of Giardia intestinalis Assemblage B Isolate GS: Is Human Giardiasis Caused by Two Different Species?
Source: PubMed Central journal article supplement (PMC2723961; doi:10.1371/journal.ppat.1000560), 2009-08-21
Supplement: ppat.1000560.s004.pdf [file ppat.1000560.s004.pdf]

**Supplemental Table 1.** Distribution of contig sizes in GS.

| <b>Size (bp)</b>   | <b>Number of contigs</b> | <b>Total length (kbp)</b> |
|--------------------|--------------------------|---------------------------|
| < 100              | 0                        | 0                         |
| >100 to <= 1000    | 2252                     | 938.962                   |
| >1000 to <= 5000   | 359                      | 702.334                   |
| > 5000 to <= 10000 | 65                       | 483.362                   |
| > 10000            | 256                      | 8877.131                  |
| <b>Total</b>       | 2932                     | 11001.789                 |
