# Supplementary material for: Draft Genome Sequencing of Giardia intestinalis Assemblage B Isolate GS: Is Human Giardiasis Caused by Two Different Species?
Source: PubMed Central journal article supplement (PMC2723961; doi:10.1371/journal.ppat.1000560), 2009-08-21
Supplement: ppat.1000560.s008.pdf [file ppat.1000560.s008.pdf]

## Supercontigs

| Supercontig name       | Size (bp)      | Mended genes                                                                                                                                               | Contigs joined                      | New contig |
|------------------------|----------------|------------------------------------------------------------------------------------------------------------------------------------------------------------|-------------------------------------|------------|
| Supercontig 1_1        | 40600          | GL50803_15295 Zinc finger protein                                                                                                                          | c429<br>c584<br>c395                | 3079       |
| Supercontig 1_2        | 23426          | GL50803_10829 Glucosamine-6-phosphate deaminase                                                                                                            | c204<br>c222                        | 3090       |
| Supercontig 1_3        | 29660          | GL50803_15156 SRP GTPase                                                                                                                                   | c755<br>c207                        | 3080       |
| Supercontig 2          | 136041         | GL50803_16733 Kinase, NEK-frag<br>GL50803_13475 Axoneme-associated protein GASP-180<br>GL50803_89887 Nucleolar GTP-binding protein 2<br>GL50803_15344 MCM2 | c492<br>c427<br>c97<br>c484<br>c249 | 3091       |
| Supercontig 3          | 131258         | GL50803_5710 Hypothetical protein<br>GL50803_15247 Grp94/Hsp90                                                                                             | c244<br>c405<br>c556<br>c504        | 3092       |
| Supercontig 4          | 139328         | GL50803_114210 Hypothetical protein<br>VSP??                                                                                                               | c498<br>c633<br>c113<br>c19         | 3081       |
| Supercontig Jon        | 65942          | GL50803_137730 Kinase                                                                                                                                      | c276<br>c468                        | 3086       |
| Supercontig Per 2      | 101072         | GL50803_11690 Variant-specific surface protein                                                                                                             | c176<br>c154                        | 3088       |
| Supercontig 10         | 65800          | GL50803_13200 RNA helicase, putative                                                                                                                       | c77<br>c326                         | 3095       |
| Supercontig Per 1      | 128690         | GL50803_16653 Hypothetical protein                                                                                                                         | c58<br>c312<br>c370<br>c616<br>c100 | 3087       |
| Supercontig 6          | 99476          | GL50803_135231 Histone H3                                                                                                                                  | c118<br>c578                        | 3093       |
| Supercontig 7_1        | 51329          | GL50803_27735 Mre11                                                                                                                                        | c461<br>c193                        | 3094       |
| Supercontig 7_2        | 73812          | GL50803_15428 IFT complex B                                                                                                                                | c288<br>c457                        | 3082       |
| Supercontig 7_3        | 57005          | GL50803_17188 Kinase, NEK                                                                                                                                  | c318<br>c594                        | 3083       |
| Supercontig 7_4        | 103750         | GL50803_8610 Coiled-coil protein                                                                                                                           | c239<br>c296                        | 3084       |
| Supercontig 8_1        | 10813          | GL50803_16110 tRNA-ribosyltransferase, putative                                                                                                            | c674<br>c277                        | 3085       |
| Supercontig 8_2        | 105695         | GL50803_9922 Exonuclease 1                                                                                                                                 | c258<br>c80                         | 3089       |
| <b>17 Supercontigs</b> | <b>1363697</b> | <b>At least 21 genes mended</b>                                                                                                                            | <b>44 contigs</b>                   |            |
