# Supplementary material for: Draft Genome Sequencing of Giardia intestinalis Assemblage B Isolate GS: Is Human Giardiasis Caused by Two Different Species?
Source: PubMed Central journal article supplement (PMC2723961; doi:10.1371/journal.ppat.1000560), 2009-08-21
Supplement: ppat.1000560.s010.pdf [file ppat.1000560.s010.pdf]

*Giardia lamblia* isolate GS genome sequence report as recommended by the Genome Standards Consortium (Field, et al., Nat. Biotech. 2008).

**Eukaryote:**

**ncbiOrganismName** : *Giardia lamblia* (syn. *Giardia intestinalis*, *Giardia duodenalis*) isolate GS

**ncbiTaxID** : 5741

**gcatID** : 005215\_GCAT

**goldStamp** : Gi00397

**genomeProjectID** : 33815

**studyData:**

**projectName** : *Giardia lamblia* isolate GS draft genome sequencing

**originalSample :**

**organismalMaterial :**

**name :**

**genus** : *Giardia*

**species** : *Giardia lamblia*

**strain**: GS M-H7

**typeStrain** : false

**healthDiseaseStatus** :

**Isolate :**

**cultureCollection :**

**identifier** : ATCC50581

**subspecificGeneticLineage** : Genotype B, M-H7

**trophicLevel** : heterotrophic (consumer)

**numReplicons** : 10

**bioticRelationship** : pathogen

**oxygenRelation** : anaerobe

**ploidyLevel** : diploid and binucleic

**extrachromosomalElements** : no

**estimatedSize** : 12000000

**originalHost** : human

**alternateHost** : mice and other mammals

**healthDiseaseStatus** : disease

**pathogenicity** : pathogenic

**propagation** : infection of the GI-tract and formation and excretion of cysts

**nucExtract:**

**method** : Easy DNA kit (Invitrogen)

**sequencing:**

**sequencingMethod** : pyrosequencing (454)

**assembly :**

**assemblyMethod** : MIRA sequence assembler

**estimatedErrorRate** : 0.29% of raw bases (before assembly)

**methodCalculation** : phred quality scores

**status** : draft

**coverage** : 16x

**contigs** : 2931

**accession** : ACGJ00000000
