# Supplementary material for: Draft Genome Sequencing of Giardia intestinalis Assemblage B Isolate GS: Is Human Giardiasis Caused by Two Different Species?
Source: PubMed Central journal article supplement (PMC2723961; doi:10.1371/journal.ppat.1000560), 2009-08-21
Supplement: ppat.1000560.s011.pdf [file ppat.1000560.s011.pdf]

## Identification of tRNA genes

### 1.1 tRNA-analysis-WB genome (from tRNAScan)

```
tRNAs decoding Standard 20 AA:          61
Selenocysteine tRNAs (TCA):            0
Possible suppressor tRNAs (CTA,TTA):    0
tRNAs with undetermined/unknown isotypes: 0
Predicted pseudogenes:                  2
-----
Total tRNAs:                            63
```

```
tRNAs with introns:                      5
```

```
| Gln-TTG: 4 | Tyr-GTA: 1 |
```

```
Isotype / Anticodon Counts:
```

```
Ala   : 4      AGC: 2      GGC:      CGC: 1      TGC: 1
Gly   : 4      ACC:      GCC: 2      CCC: 1      TCC: 1
Pro   : 3      AGG: 1      GGG:      CGG: 1      TGG: 1
Thr   : 3      AGT: 1      GGT:      CGT: 1      TGT: 1
Val   : 4      AAC:      GAC: 2      CAC: 1      TAC: 1
Ser   : 4      AGA: 1      GGA:      CGA: 1      TGA: 1      ACT:
GCT: 1
Arg   : 6      ACG: 2      GCG:      CCG: 1      TCG: 1      CCT: 1
TCT: 1
Leu   : 6      AAG: 2      GAG:      CAG: 1      TAG: 1      CAA: 1
TAA: 1
Phe   : 1      AAA:      GAA: 1
Asn   : 2      ATT:      GTT: 2
Lys   : 3
Asp   : 3      ATC:      GTC: 3
Glu   : 3
His   : 1      ATG:      GTG: 1
Gln   : 4
Ile   : 4      AAT:      GAT: 3
Met   : 3
Tyr   : 1      ATA:      GTA: 1
Supres: 0
Cys   : 1      ACA:      GCA: 1
Trp   : 1
SelCys: 0
CCA: 1
TCA:
```

## 1.2 tRNA-analysis-GS genome (from tRNAScan)

Subject: GS assembled contigs

```
tRNAs decoding Standard 20 AA:          58
Selenocysteine tRNAs (TCA):            0
Possible suppressor tRNAs (CTA,TTA):    0
tRNAs with undetermined/unknown isotypes: 0
Predicted pseudogenes:                  0
-----
Total tRNAs:                            58
```

```
tRNAs with introns:                      7
```

```
| Gln-TTG: 6 | Tyr-GTA: 1 |
```

Isotype / Anticodon Counts:

```
Ala   : 3      AGC: 1      GGC:      CGC: 1      TGC: 1
Gly   : 2      ACC:      GCC: 1     CCC: 1     TCC:
Pro   : 3      AGG: 1     GGG:      CGG: 1     TGG: 1
Thr   : 4      AGT: 2     GGT:      CGT: 1     TGT: 1
Val   : 2      AAC:      GAC:      CAC: 1     TAC: 1
Ser   : 4      AGA: 1     GGA:      CGA: 1     TGA: 1     ACT:
GCT: 1
Arg   : 6      ACG: 2     GCG:      CCG: 1     TCG: 1     CCT: 1
TCT: 1
Leu   : 6      AAG: 2     GAG:      CAG: 1     TAG: 1     CAA: 1
TAA: 1
Phe   : 1      AAA:      GAA: 1
Asn   : 2      ATT:      GTT: 2
Lys   : 2      CTT: 1     TTT: 1
Asp   : 2      ATC:      GTC: 2
Glu   : 2      CTC: 1     TTC: 1
His   : 1      ATG:      GTG: 1
Gln   : 8      CTG: 1     TTG: 7
Ile   : 4      AAT:      GAT: 3     TAT: 1
Met   : 3      CAT: 3
Tyr   : 1      ATA:      GTA: 1
Supres: 0      CTA:      TTA:
Cys   : 1      ACA:      GCA: 1
Trp   : 1      CCA: 1
SelCys: 0      TCA:
```

### 1.3 tRNA-analysis on GS reads not in assembly (from tRNAscan)

Subject: Analysis of reads not included in the GS assembly

```
tRNAs decoding Standard 20 AA:          10
Selenocysteine tRNAs (TCA):            0
Possible suppressor tRNAs (CTA,TTA):    0
tRNAs with undetermined/unknown isotypes: 1
Predicted pseudogenes:                  0
-----
Total tRNAs:                             11
```

```
tRNAs with introns:                      1
```

```
| Gln-TTG: 1 |
```

Isotype / Anticodon Counts:

```
Ala   : 1      AGC:      GGC:      CGC: 1      TGC:
Gly   : 3      ACC:      GCC:      CCC: 1      TCC: 2
Pro   : 0      AGG:      GGG:      CGG:      TGG:
Thr   : 0      AGT:      GGT:      CGT:      TGT:
Val   : 2      AAC:      GAC: 2     CAC:      TAC:
Ser   : 0      AGA:      GGA:      CGA:      TGA:      ACT:
GCT:
Arg   : 0      ACG:      GCG:      CCG:      TCG:      CCT:
TCT:
Leu   : 0      AAG:      GAG:      CAG:      TAG:      CAA:
TAA:
Phe   : 0      AAA:      GAA:
Asn   : 0      ATT:      GTT:
Lys   : 0      CTT:      TTT:
Asp   : 1      ATC:      GTC: 1
Glu   : 0      CTC:      TTC:
His   : 0      ATG:      GTG:
Gln   : 1      CTG:      TTG: 1
Ile   : 1      AAT:      GAT: 1      TAT:
Met   : 1      CAT: 1
Tyr   : 0      ATA:      GTA:
Supres: 0      CTA:      TTA:
Cys   : 0      ACA:      GCA:
Trp   : 0      CCA:
SelCys: 0      TCA:
```
