# Supplementary material for: Draft Genome Sequencing of Giardia intestinalis Assemblage B Isolate GS: Is Human Giardiasis Caused by Two Different Species?
Source: PLOS journal article supplement (doi:10.1371/journal.ppat.1000560), 2009-08-20
Supplement: S7 (10.1371/journal.ppat.1000560.s007) [file journal.ppat.1000560.s007]

## Synteny breaks in GS genome

| GS Contig   | Primers        | Type of rearrangement                                      | Genes involved                                                                                                                                                                                                                                                                                     | WB scaffold | Verified                |
|-------------|----------------|------------------------------------------------------------|----------------------------------------------------------------------------------------------------------------------------------------------------------------------------------------------------------------------------------------------------------------------------------------------------|-------------|-------------------------|
| <b>3057</b> | 197-F1, 197-R1 | Intrachromosomal translocation                             |                                                                                                                                                                                                                                                                                                    | CH991779    | Yes, PCR and sequencing |
|             | 197-F1, 197-R2 |                                                            |                                                                                                                                                                                                                                                                                                    | CH991779    | Yes, PCR                |
| <b>387</b>  | 135-F1, 135-R1 | Insertion of ORF in GS/M (GSMH7-1637) or deletion in WB/C6 |                                                                                                                                                                                                                                                                                                    | CH991814    | Yes, by PCR             |
| <b>3089</b> | 80-F1, 80-R1   | Cluster of genes absent in GSM                             | GL50803_137608 VSP with INR<br>GL50803_39305 Hypothetical protein<br>GL50803_92835 VSP, putative<br>GL50803_113491 VSP<br>GL50803_41476 VSP<br>GL50803_125106 Hypothetical protein<br>GL50803_96055 VSP, putative                                                                                  | CH991779    | Yes, PCR and sequencing |
| <b>3091</b> | 249-F1, 249-R1 | Inversion                                                  |                                                                                                                                                                                                                                                                                                    | CH991768    | Yes, PCR and sequencing |
| <b>3082</b> | 288-F1, 288-R1 | Cluster of genes absent in GSM                             | GL50803_106010 Hypothetical protein<br>GL50803_137742 Kinase, NEK<br>GL50803_118483 Hypothetical protein<br>GL50803_114470 High cysteine membrane protein Group 6<br>GL50803_29575 Hypothetical protein<br>GL50803_118482 Kinase, NEK<br>GL50803_137743 Hypothetical protein<br>GL50803_137744 VSP | CH991782    | Yes, PCR and sequencing |
| <b>111</b>  | 11-F1, 11-R1   | Cluster of genes absent in GS/M                            | GL50803_93742 Variant-specific surface protein<br>GL50803_104193 Hypothetical protein<br>GL50803_31839 Hypothetical protein<br>GL50803_7629 Hypothetical protein<br>GL50803_93743 Hypothetical protein<br>GL50803_7632 Hypothetical protein                                                        | CH991801    | Yes, PCR and sequencing |
| <b>1168</b> | 211-F1, 211-R1 | Partial deletion of gene                                   | GL50803_16318 High cysteine membrane protein Group 1                                                                                                                                                                                                                                               | CH991767    | Yes, PCR and sequencing |
| <b>419</b>  | 138-F1, 138-R1 | Intrachromosomal translocation                             |                                                                                                                                                                                                                                                                                                    | CH991767    | Yes, PCR and sequencing |

## Synteny breaks in GS genome

|             |                |                                                                            |                                                                                                                                                                                                                                                                                                                                                                                                       |                      |                         |
|-------------|----------------|----------------------------------------------------------------------------|-------------------------------------------------------------------------------------------------------------------------------------------------------------------------------------------------------------------------------------------------------------------------------------------------------------------------------------------------------------------------------------------------------|----------------------|-------------------------|
| <b>112</b>  | 110-F1, 110-R1 | Cluster of genes absent in GS/M                                            | GL50803_32958 Protein kinase<br>GL50803_4033 Protein kinase<br>GL50803_92983 Protein 21.1<br>GL50803_13520 VSP<br>GL50803_92985 Hypothetical protein<br>GL50803_20912 Hypothetical protein                                                                                                                                                                                                            | CH991779             | Yes, PCR and sequencing |
| <b>3092</b> | 556-F1, 556-R1 | Inversion and cluster of genes absent in GS/M<br>(other edge in contig244) | GL50803_103540 Hypothetical protein<br>GL50803_27813 Protein 21.1<br>GL50803_Hypothetical protein<br>GL50803_Hypothetical protein                                                                                                                                                                                                                                                                     | CH991763             | Yes, PCR and sequencing |
| <b>3092</b> | 244-F1, 244-R1 | Inversion and cluster of genes absent in GS/M (other edge in contig556)    |                                                                                                                                                                                                                                                                                                                                                                                                       | CH991763             | Yes, PCR and sequencing |
| <b>647</b>  | 159-F1, 159-R1 | Two genes absent in GS/M                                                   | GL50803_31542 Hypothetical protein<br>GL50803_14324 High cysteine protein                                                                                                                                                                                                                                                                                                                             | CH991782             | Yes, PCR and sequencing |
| <b>1538</b> | 245-F1, 245-R1 | Interchromosomal translocation                                             |                                                                                                                                                                                                                                                                                                                                                                                                       | CH991768<br>CH991767 | Yes, PCR and sequencing |
| <b>3093</b> | 118-F1, 118-R1 | Gene absent in WB/C6                                                       | M-GL_GSMH7-2323 Hypothetical protein<br>(Unique protein distantly related to Kinase, NEK)                                                                                                                                                                                                                                                                                                             | CH991814             | Yes, PCR and sequencing |
| <b>3081</b> | 113-F1, 113-R1 | Cluster of genes missing in GS/M                                           | GL50803_1713 Protein 21.1<br>GL50803_24701 Hypothetical protein<br>GL50803_115673 Hypothetical protein<br>GL50803_117312 Hypothetical protein<br>GL50803_11521 VSP<br>GL50803_115439 Hypothetical protein<br>GL50803_106057 Hypothetical protein<br>GL50803_118786 VSP, putative<br>GL50803_115438 Hypothetical protein<br>GL50803_117311 Hypothetical protein<br>GL50803_115672 Hypothetical protein | CH991768             | Yes, PCR and sequencing |
| <b>2481</b> | 467-F1, 467-R1 | Cluster of genes missing in GS/M                                           | GL50803_102841 Hypothetical protein<br>GL50803_31911 Hypothetical protein<br>GL50803_42698 Kinase, NEK<br>GL50803_95847 Protein 21.1<br>GL50803_113433 Hypothetical protein<br>GL50803_8595 VSP                                                                                                                                                                                                       | CH991763             | Yes, PCR and sequencing |

## Synteny breaks in GS genome

|             |                |                                                                                                |                                                                                                                                        |                      |                          |
|-------------|----------------|------------------------------------------------------------------------------------------------|----------------------------------------------------------------------------------------------------------------------------------------|----------------------|--------------------------|
| <b>3067</b> | C202F, C202R1  | Interchromosomal translocation                                                                 |                                                                                                                                        | CH991768<br>CH991767 | Yes, PCR and sequencing  |
| <b>1431</b> | 235-F1, 235-R1 | Interchromosomal translocation                                                                 |                                                                                                                                        | CH991762<br>CH991771 | Yes, PCR and sequencing  |
| <b>3095</b> | 326-F1, 326-R1 | Cluster of genes missing in GS/M                                                               | GL50803_102444 Protein 21.1<br>GL50803_35621 Hypothetical protein<br>GL50803_112518 Kinase, NEK<br>GL50803_112519 Hypothetical protein | CH991767             | Yes, PCR and sequencing  |
| <b>3065</b> | 237-F1, 237-R1 | Insertion of three ORFs in GS/M (GSMH7-2671, -6128 and 1584 (Cathepsin B) or deletion in WB/C6 |                                                                                                                                        | CH991782             | Yes, PCR product (mixed) |
| <b>3091</b> | 249-F3, 249-R3 | Inversion                                                                                      |                                                                                                                                        | CH991768             | Yes, PCR product (mixed) |
| <b>3050</b> | 83-F1, 83-R1   | Insertion of VSP in GS/M (GSMH7-4823) or deletion in WB/C6                                     |                                                                                                                                        | CH991763             | Yes, PCR product (mixed) |
| <b>1987</b> | 286-F1, 286-R1 | Cluster of genes missing in GS/M                                                               | GL50803_112693 VSP<br>GL50803_112695 Hypothetical protein<br>GL50803_112696 Hypothetical protein<br>GL50803_98653 Hypothetical protein | CH991768             | Yes, PCR product (mixed) |

### Putative misassembled regions

|                   |                |                                                                      |                                                                                         |                      |                        |
|-------------------|----------------|----------------------------------------------------------------------|-----------------------------------------------------------------------------------------|----------------------|------------------------|
| <b>3046, 3047</b> | 474-F1, 474-R1 | Synteny break in highly similar genes<br>Protein disulfide isomerase | Miassembly between PDI-3, GL50803_14670<br>and PDI-5, GL50803_8064                      |                      | Verified and corrected |
| <b>3044, 3045</b> | 455-F1, 455-R1 |                                                                      |                                                                                         |                      |                        |
| <b>1036</b>       | PeroxiF, C196R | Synteny break in highly similar genes<br>Peroxiredoxin 1             | Putative missassembly between GL50803_14521<br>and GL50803_16076                        | CH991782<br>CH991776 | Not verified           |
| <b>2609</b>       | PeroxiF, C592F |                                                                      |                                                                                         |                      |                        |
| <b>1055</b>       | 2-F1, 2-R1     | Synteny break in highly similar genes<br>Hypothetical protein        | Putative missassembly between GL50803_115478 and<br>GL50803_115479                      | CH991793             | Not verified           |
| <b>2731</b>       | 71-F1, 71-R1   | Synteny break in highly similar genes<br>Topoisomerase II - like     | Putative missassembly between GL50803_16795<br>Topoisomerase II and GL50803_101906 SDK1 |                      | Not verified           |

## Synteny breaks in GS genome

|                   |                |                                                                |                                                               |  |              |
|-------------------|----------------|----------------------------------------------------------------|---------------------------------------------------------------|--|--------------|
| <b>2460</b>       | 445-F1, 445-R1 | Synteny break in similar genes ABC transporter family proteins | Putative missassembly between GL50803_92223 and GL50803_8227  |  | Not verified |
| <b>2493</b>       |                | Synteny break in highly similar genes Acyl-CoA synthetase      | Putative missassembly between GL50803_16667 and GL50803_86511 |  | Not verified |
| <b>3060, 3076</b> | 191-F1, 191-R1 | Synteny break in highly similar genes, Histone H2A             |                                                               |  | Not verified |

### Regions that have not been verified

|                   |                       |                                                                                                         |  |          |              |
|-------------------|-----------------------|---------------------------------------------------------------------------------------------------------|--|----------|--------------|
| <b>3079</b>       |                       | Insertion of ORF in GS/M (GSMH7-5233) Na <sup>+</sup> driven multidrug efflux pump or deletion in WB/C6 |  | CH991762 | Not verified |
| <b>2358</b>       |                       | Insertion of ORF in GS/M (GSMH7-2895) Protein 21.1 or deletion in WB/C6                                 |  | CH991782 | Not verified |
| <b>757</b>        | 169-F1, 169-R1        | Inversion                                                                                               |  | CH991779 | Not verified |
| <b>3091</b>       | 249-F2, 249-R2        | Inversion                                                                                               |  | CH991768 | Not verified |
| <b>1055</b>       | 2-F2, 2-R2            | Synteny break                                                                                           |  |          | Not verified |
| <b>485</b>        | 144-F1, 144-R1        | Intrachromosomal translocation                                                                          |  | CH991768 | Not verified |
| <b>2435</b>       | 42-F1, 42-R1          | Problematic region                                                                                      |  | CH991782 | Not verified |
| <b>2435</b>       | 42-F2, 42-R2          | Problematic region                                                                                      |  | CH991782 | Not verified |
| <b>3048, 3049</b> | 621-F1, 621-R1        | Synteny break                                                                                           |  |          | Not verified |
| <b>3054</b>       | 69-F1, 69-R1          | Deletion of GL50803_119672 in GS/M                                                                      |  |          | Not verified |
| <b>1420, 3063</b> | F10217-F, 234Link1866 | Should be paired                                                                                        |  |          | Not verified |
