# Supplementary material for: Draft Genome Sequencing of Giardia intestinalis Assemblage B Isolate GS: Is Human Giardiasis Caused by Two Different Species?
Source: PLoS Pathog. 2009 Aug 21;5(8):e1000560. doi: 10.1371/journal.ppat.1000560 (PMC2723961; doi:10.1371/journal.ppat.1000560)
Supplement: Table S3 — Small RNAs identified in Giardia GS and WB. (0.12 MB PDF) [file ppat.1000560.s006.pdf]

| Small RNA name | Annotation                                                   | Type    | Size (bp) | GS Identity (%) | Sequence WB                                                                                                                                   | Reference |
|----------------|--------------------------------------------------------------|---------|-----------|-----------------|-----------------------------------------------------------------------------------------------------------------------------------------------|-----------|
| Candidate 1    | Possible new C/D-box snoRNA                                  | sRNA    | 65        | 94              | AAAAAATAAAATGAAGACAGAACCACAGACCTGTACTGACCCTTGATGTTAGTTGTGCTCGCTCTGATA                                                                         | (1)       |
| Candidate 2    | Possible new C/D-box snoRNA                                  | sRNA    | 61        | 97              | TGATGATTCTGAATTACCGCCCGAGGGCCCTCGGGCTCCGCTGAGGACATGCTGGTCTGACT                                                                                | (1)       |
| Candidate 3    | No annoation                                                 | Unknown | 106       | -               | CCGATCGAAGACCAAGCGGTGCTAGGTTCAAGCCAGGGCCAAGACCCGGGCAGTCTGTGCTGTGG<br>GGCGCCGCTGTAGACGTCTTCCGAACACACCTGCGATAAAC                                | (1)       |
| Candidate 4    | No annoation                                                 | Unknown | 73        | -               | CCACACAAAAGGTGAGCGCGTAAGCAAAAGCCAGAAGCCCGTTGCAGCGCTTGCTTCGCAGCTCT<br>ACGGGCGC                                                                 | (1)       |
| Candidate 5    | No annoation                                                 | Unknown | 47        | 94              | CCCCATGCATTTTTCCTTGCCAGTCTGCCTCCATACTAATTTCTCCT                                                                                               | (1)       |
| Candidate 6    | Fragment of a transcript containing RNaseP and GlsR15 snoRNA | Unknown | 121       | 88              | GATGCGCCAGGCTGACGGTAGGACGCTAACCAGATTGAGTACTCCTTGTTCTCGCAGAAT<br>GATTATCTGTCTCCGAGCAAGCAGACTATGAGCTTACTTATGAGATCTGACTCC                        |           |
| Candidate 7    | No annotation                                                | Unknown | 41        | 88              | AGACAGAAGTAGAGCCCGTTCTCCAGTAAATCTGCAGCTCA                                                                                                     | (1)       |
| Candidate 8    | No annotation                                                | Unknown | 43        | -               | GCTGAGAACGTCAGGAAGGAGCCTAGAAAAGAAGTTGCTGCAC                                                                                                   | (1)       |
| Candidate 9    | No annotation                                                | Unknown | 72        | -               | AGGAACCTATATTAGCAGAATTGGAACGTTATAAGTGGGCTCCATCTTTTGCAGAATGTTGGAA<br>ATGTAGT                                                                   | (1)       |
| Candidate 10   | No annotation                                                | Unknown | 86        | 81              | ACGGGAATAACGCCACAGGATCTCAAGGAAGGGGCCCTCAACTTGAAGCTCTGATCGGGTCCC<br>AAGCACAAAGTAAATAATTGCC                                                     | (1)       |
| Candidate 11   | No annotation                                                | Unknown | 95        | 93              | CTAGGCTGAAGCTGCCAAGGTGCGTGATCCCTCGGTGATGCCTTGAGTGTTGCTTCACCAAAGAA<br>CAACCACACGGCACAGCCGAATCTCTCATT                                           | (1)       |
| Candidate 12   | No annotation                                                | Unknown | 62        | 95              | CCCGATGACGAATAGCTGTCTTGCGGAGGCGGTCATGACGACGAAGCCATCACGTAGGATC                                                                                 | (1)       |
| Candidate 13   | Fragment of new C/D-box snoRNA                               | sRNA    | 58        | 95              | CACGACGGTCTACTGAGAACCCAGTATCTTTAGACTGCTGAGACAGTGTTATATGATT                                                                                    | (1)       |
| Candidate 14   | No annotation                                                | Unknown | 136       | 95              | CAGAGTCGGCTTCGACTTTAGCGTAGTTACTGTTTCGTCGGCTTAACCGCCGATCCACTACATGC<br>AAGGGGCAGCCGGCTGTGAGGCAGCTGCCAGGATGGTCTGCCCTTGTCGGGCTGGCGCCGTC<br>CACCTT | (1)       |
| Candidate 15   | No annotation                                                | Unknown | 92        | 97              | CTTCAACTCAGCCGGACAGCCGGAGGCCGGAGACGGAGCACGGTCAGGCGGGGGGTGCAGTGC<br>CAGCCCCAGCCGAGAGCGGCTTCCTT                                                 | (1)       |
| Candidate 16   | Possible new H/ACA box snoRNA                                | Unknown | 78        | 91              | CTGCGCTCTGCCAGATACGCCGACAGAAAGCACCAAGGAAGGATGTGGATCTCCATGTCTGCCGT<br>GTGCGCGCATATC                                                            | (1)       |

|                     |                                           |         |              |    |                                                                                                                                                                              |         |
|---------------------|-------------------------------------------|---------|--------------|----|------------------------------------------------------------------------------------------------------------------------------------------------------------------------------|---------|
| <b>Candidate 17</b> | No annotation                             | Unknown | 166          | 98 | TTCGGGATCAGTTTGGAGTTAATACCACCAAACCCCTGTGCGTACATGTCGCCCCCTAACCTTC<br>TGATGCGGATACCTTGCCGACAGGCGCTTAAGCGAGGCTTGGCCCGTGCACGATGAGGCTCCCT<br>GCGGGGAAGCCCTGCGGCGCGTCTTAAGGAGGCAAC | (1)     |
| <b>Candidate 18</b> | No annotation                             | Unknown | 120          | 91 | TCTGGATTCCGGGGAGTGTCTGGTGCCGATCGGACACTCCCTAGCCGCCACACTGACAGTTATGG<br>TTGCAGGACAAGCTTAGCGAGTCCGAACTCGACAGGGATACTCTACAGCGTTCCT                                                 | (1)     |
| <b>Candidate 19</b> | No annotation                             | Unknown | 42           | -  | GCGTAAGGTTTTCTGTCAGACTACCCAGAGTAAACCGGTGAG                                                                                                                                   | (1)     |
| <b>Candidate 20</b> | No annotation                             | Unknown | 133          | 84 | TGTAGGTCTAACATGCTTGCCACGGCGTCCCCGGACATGGCACCGTCTATGTCCTGCTTGTGGCG<br>AGGATGAGGATGGGAACACCTGAGCTTGGGGCTGTTAGTACGCCCTCAAGAGCCGTCGAGCCTCCT                                      | (1)     |
| <b>Candidate 21</b> | No annotation                             | Unknown | 114          | -  | TGGACGATGAAC TGAGATGCTGGACACGGCTTTGCTCTCCACCGGAGCACATATGCTGCAGGATG<br>ACCGGCGCCTGTCTCCCAACACGTGCCAGCTAACTGCAGCCACATT                                                         | (1)     |
| <b>Candidate 22</b> | No annotation                             | Unknown | 60           | -  | GTATGCTGCTATGCTGACATGCCGGTACACTTTTTATGAGAGCGAATGTAAATAGCCCTG                                                                                                                 | (1)     |
| <b>Candidate 23</b> | No annotation                             | Unknown | 54           | 85 | TACCACTCTGACCGTGAGGCGCATGCCTAGGGCATGGAGAAGAGCAGACTTGAG                                                                                                                       | (1)     |
| <b>Candidate 24</b> | No annotation                             | Unknown | 110          | 82 | TGTGCCACTGTGGCTTCGAGCTCTATAATGCGCGACTTAAGAACCTCTGCTTCTACAGACTTTACTT<br>CAAGTAAAGATGTCGAGTTAGTGCCTCCTCAACACAGCTTTC                                                            | (1)     |
| <b>Candidate 25</b> | No annotation                             | Unknown | 140          | -  | GAGGTAATAGACCAGGCTGCCAGCCCGCGAAGGTCTGCAAGTGTGACGGAGACAATGGCTACACGC<br>TCCAGGGCGACGCGTGACCAAGGCGGCTCCTGACAACGCGTGCCAGACCCTGGGAACCGCCGGGTG<br>TGCCAC                           | (1)     |
| <b>Candidate 26</b> | No annotation                             | Unknown | 71           | -  | CTGAACGATAGAAAAGACGCGTGCGAGGCGGTTGCCAACACAACTGCGCACAAGAGCTGCAGAATG<br>CGGC                                                                                                   | (1)     |
| <b>Candidate 27</b> | Fragment of<br>variant surface<br>protein | Unknown | 51           | 84 | TGCCTCACCTGCACCACTTCGTGCGATAAGATCAGGCCGGACGAGAAGGGC                                                                                                                          | (1)     |
| <b>Candidate 28</b> | No annotation                             | Unknown | 90           | -  | CAGAAGAATGCCAGCAAGTCATGCAATGCCTGTGGATCCGTCCTTCGACCTTCTCCTGACAGACATG<br>TGTCTTTTGGCATGCAGCCCTGC                                                                               | (1)     |
| <b>Candidate 29</b> | No annotation                             | Unknown | 87           | -  | GCTCCTAGAGGAAGAGGCAGGCATGCAGGATATTTTTGGATGGACAGCCCTCATAAGGGCAGCAGAG<br>AGTGGCCACGCAGGCTGCAC                                                                                  | (1)     |
| <b>Candidate 30</b> | No annotation                             | Unknown | 96           | -  | CCCACGGCGTTCCAGTGTGCGCAGGGGCAAGGAGGCTGCTCTCCCTGGCCTCTGCGGAAACGGG<br>CAGCTGCGTGATCCACTGACAGCCACCAC                                                                            | (1)     |
| <b>Candidate 31</b> | No annotation                             | Unknown | 60           | -  | GGCGCAGACAACAGCAAGAGTCCAGATGGAGTACCTGCACTCCGCCAAGGTTTAGCGTAG                                                                                                                 | (1)     |
| <b>GLsR1</b>        | C/D-box sRNA<br>(RNA H)                   | sRNA,   | 85<br>[80]   | 88 | GTCCACTGGCCTCTCCTGAGGCAGATGATGACTTTGCGACGGGCGGAACGGAGGGACGCGTGACGAAG<br>TTTGTGCTATTCTGAATT                                                                                   | (2),[3] |
| <b>GLsR2</b>        | C/D-box sRNA<br>(RNA J)                   | sRNA    | 104<br>[116] | 99 | TGTAGCGAACCCACGCGCAAGCGTTGCTACGAGGCGATGGAGACAAAAGCAGTTACGTTCGCAACTC<br>TCTGAGGGTTCTTGATGCTTCTTGATGTCCGAGCC                                                                   | (2),[3] |

|               |                         |                                    |              |    |                                                                                                                                                                                          |          |
|---------------|-------------------------|------------------------------------|--------------|----|------------------------------------------------------------------------------------------------------------------------------------------------------------------------------------------|----------|
| <b>GLsR3</b>  | C/D-box sRNA            | sRNA<br>(3' fragment of<br>5S RNA) | 79           | 99 | CCGAATTAAGAAGAGAAGCGCCGTCAGGCCCGCCAGTACTGCGATCGGAGACGTCGTGGGAACACG<br>GGGTGCCGAACC                                                                                                       | (2)      |
| <b>GLsR4</b>  | C/D-box sRNA            | sRNA                               | 61           | 84 | TGTCTCCATGACGAGAATTACGCCGCCCCAGTCTGACCCCTGACGAACGGCTTCTCTGATC                                                                                                                            | (2)      |
| <b>GLsR5</b>  | C/D-box sRNA            | sRNA                               | 89           | 96 | AATTAAAAGCTGTGATGACAGGTTCTTGCCCCGTATGACCCCTGC GATGAGTTATACAAAAGAACGC<br>ATCCAAGCCAACCGGCTGAGCTC                                                                                          | (2)      |
| <b>GLsR6</b>  | C/D-box sRNA            | sRNA                               | 59           | 93 | AATGATGGCTTGTATCCCTGTCTGAGGTCAATACCTTGATTAGACGATTTGACAGAGC                                                                                                                               | (2)      |
| <b>GLsR7</b>  | C/D-box sRNA            | sRNA                               | 60           | 85 | CCGCGATGATTACCGAATCACAGCGATACACGATGAAGCACTCATAGTTACTCTGAGCGG                                                                                                                             | (2)      |
| <b>GLsR8</b>  | C/D-box sRNA            | sRNA                               | 70           | 97 | CGTAGATGAAGAGAGATAAATCAGCTACCGCTGAGCCCAACGTGAGGAAGAAACCGCCTTTCGTCT<br>GACC                                                                                                               | (2)      |
| <b>GLsR9</b>  | C/D-box sRNA            | sRNA                               | 79           | 94 | TAGCAACCCGTGATTTGCAACGCTTAGTCCGTGTTTCGGAGTGTCTTGCACGCTGATGAGTGAAAG<br>CACACATGAGGTT                                                                                                      | (2)      |
| <b>GLsR10</b> | C/D-box sRNA            | sRNA                               | 68           | 91 | AGAATGATGAGACGTGTTCTCTCTCTACAGACTCCCTGGGGATGCTATGTACACCTTACTGATT<br>TA                                                                                                                   | (2)      |
| <b>GLsR11</b> | C/D-box sRNA            | sRNA                               | 143          | 91 | GGCGGTGATTAGGCTGCGTGCGCAGCCGTGCCTTCCGCTCCGCTGTGTCTGGGGATTGCTCAG<br>TGCCCCGATCCTCACCACGAGTAAACCGCGGCTCAAAGAAGCGCATTATCCAGGAGGTCTAGA<br>AACTGACCTCC                                        | (2)      |
| <b>GLsR13</b> | C/D-box sRNA            | sRNA                               | 100          | 92 | ATCCATTTCGTATGAGATATGATGATTGGGAGCGACCTATCTTGAGGACGACGGCCGCCGTCTTAC<br>CTTGTGACGTTTGCCGTCTTACAATGCTCTGACC                                                                                 | (2)      |
| <b>GLsR14</b> | C/D-box sRNA            | sRNA                               | 69           | 93 | AAATGATGACAATGCGCATTTGTGAGAAGGCTCACTTCTGATGATTCTCTGTCCATTCCCCTGAT<br>CCT                                                                                                                 | (2)      |
| <b>GLsR15</b> | C/D-box sRNA            | sRNA                               | 87           | 86 | GATTGAGCTACTCTTGGTTCCCTCGCAGAATGATTATCTGTCTCCGAGCAAGCACGACTATGAGC<br>TTACTTATGAGATCTGACTCC                                                                                               | (2)      |
| <b>GLsR16</b> | C/D-box sRNA            | sRNA                               | 77           | 92 | TAAAACTATGATGAGGTTAGCGATCCCAAGCGGGGCTGGCCCTGCGTTGCAGACAACGCATCACC<br>GCTCTGACCTT                                                                                                         | (2)      |
| <b>GLsR17</b> | C/D-box sRNA<br>(RNA D) | sRNA                               | 144<br>[147] | 92 | GTTTCTAGACCTCCTGGGATAATGCGCTTCTTTGAGCCGCGGGTTTACTCGTGGTGAGGATCCGGGG<br>CACTGAGCAATCCCCAGGACACAGGCGGAGCGGAAGGCACGGCTGCGCCACGCAGCCTAATCACCGC<br>CCCTATAGTC                                 | (2), [3] |
| <b>GLsR18</b> | H/ACA sRNA              | sRNA                               | 109          | 84 | CGTGGCCGGTGCAGCTGCCCCTGGCGCTTGCAGAGCGTGCACAGGCCTACATCCAGGGTCATAGGTG<br>GGGAGCGGATCCCGTCCATCCTCAATCCGGGCCGACAGTC                                                                          | (2)      |
| <b>GLsR19</b> | H/ACA sRNA              | sRNA                               | 176          | 79 | AAAAACGATGATAGGGACAGGCTGGGTGGAGGCTCGGCGTCTCGTTCTGGGAAAAGCAAGCAGAAGC<br>CCAGTTTGGTCTCTACCGGCGTATGCATGTGCATAGGCTGGCCAAGCATCGTTGATAGAAGCTGCTC<br>TTGGTCACCGGAGGGTCTCCGGTTTCATACGCAGAGACATCC | (2)      |
| <b>GLsR20</b> | H/ACA sRNA              | sRNA                               | 108          | 87 | AAAAATGCCAGCTGAGTTACGTCTGTGTGCACAGGCGCGTCAGAGGCCGGCTAGAGCGCGACTGGTT<br>GAGTCCCAGAGCGATCTGGGTGATTAGCAGTCATACAGTC                                                                          | (2)      |

|                                                            |                               |       |     |    |                                                                                                                                                                                                                                                                           |             |
|------------------------------------------------------------|-------------------------------|-------|-----|----|---------------------------------------------------------------------------------------------------------------------------------------------------------------------------------------------------------------------------------------------------------------------------|-------------|
| <b>GLsR21</b>                                              | H/ACA sRNA                    | sRNA  | 112 | 87 | AAAACCAATATTACTACCATCGGTCTCACCCTAGATCGGTGTTATGCTTTGTGGGATAGCAGGC<br>CGTGCCAGTTGGACAGCCAAGGTCCACCTCTGGTTCGGCACACAT                                                                                                                                                         | (2)         |
| <b>GLsR22</b>                                              | H/ACA sRNA                    | sRNA  | 118 | 82 | ACGCAAGCCCTCTAGCAAGATGCAGGCCGGAGCCTGTGTCTCGTTCCTGGGGCGATAGCTCTTGCT<br>GGCAGGTCTTGCACTGTCCATACCCGGGCAACACGTTTTCCAGCTACACCT                                                                                                                                                 | (4)         |
| <b>GLsR23</b>                                              | H/ACA sRNA                    | sRNA  | 118 | 81 | AAAAATCGTCTGGCCGCTCGTGCTACGATGGGCTAGGGAAATGCCGTGACGAGACACGCACTGGG<br>TGGCCATTGCGTCTGCGGTAGATCCGCCGATTCCACAGCCAGAAACACCC                                                                                                                                                   | (4)         |
| <b>GLsR24</b>                                              | H/ACA sRNA                    | sRNA  | 125 | 78 | ATAATTTGGGGCAGTCCTTGCCCGCGGAGGGCACTTAAGGCTCCGGGGCCGGGGCAGAGTCGGCCC<br>TCCCAGAGCCCGCCGACGCCCCGAGCGCCAGCCCGGCGCAGGGGCCCGGCCACACTC                                                                                                                                           | (4)         |
| <b>GLsR25</b>                                              | H/ACA sRNA                    | sRNA  | 119 | 82 | TAAATCGAGGCTGCTAAACACAGGGCTGCACAGCATCCTTGACCTGCGTAGCCGATAGGTACGGG<br>T<br>GACCGTTTATCCCGGGCTCGTGTGGGCCCGGTAGGCACGGTCAAAGAGTT                                                                                                                                              | (4)         |
| <b>Ribonuclease P<br/>RNA subunit</b>                      |                               | ncRNA | 246 | 89 | AGGAATTAGGAGGGGCGCCACCGACCGGTCGGGGGAAGGCTGAGGTCAATTTCCGTGAGGGAGG<br>C<br>GCGCCAACGCGTGCAGCAGTCGCACCAGAAACCAAGAGCCTCTGTGCTTATGCCAGGAGGAGGCCT<br>T<br>GCCCCACTGAGAGTGCTCGCTGAAAGAGGCTGCGACGCGGGTTATTCAAGTTTCGATGCGCCAGGCTG<br>A<br>CGGTAGGACGCCTAACCCGATTCACTACTCCTTGGTTCCT | (5)         |
| <b>Signal<br/>recognition<br/>particle RNA<br/>subunit</b> |                               | ncRNA | 170 | 92 | GGACGCCGAAGCAGCCGCGGCCCTCTGGCTTGGACCCCGTGGCGTCGCCGGCCTCCGCGGAGGCAGGG<br>G<br>CCGGCCCGCCTTCAACTCAGCCGACAGCCGGAGGCCGAGACGGAGCACGGTCAGGCGGGCGGGGT<br>G<br>CAGTGCCAGCCCCAGCCGACAGCGGCTTCCTTT                                                                                  | Unpublished |
| <b>U1 RNA</b>                                              | Candidate<br>spliceosomal RNA | ncRNA | 122 | 77 | AAACATCAGCGGCATCGTCATCA (C/T) GAAGATGAGCAAAAGCATAAAGTTCGAGATC (C/T) TCA<br>T<br>CGTGTCTGCGAAGAGGAGGTTGACCAGGTTGCCGGCGGCAGAATTTTGGCGGGTGATGTCCG                                                                                                                            | (6)         |
| <b>U2 RNA</b>                                              | Candidate<br>spliceosomal RNA | ncRNA | 174 | 66 | ACTTGCGTGAACACAGCTGCATTGAACAATAGTTTCTGCTCAAATGAGAGATCAGTATAATATGG<br>CTGATTAGCGTGAGCTGCATGCCTTTTCATATTCGTTTGTGTTTGTGCTTGTGTTTAACTAAC<br>AACTAGGATAGTCGCCTTGACGCGACAAGAATATCCTACG                                                                                          | (6)         |
| <b>U4 RNA</b>                                              | Candidate<br>spliceosomal RNA | ncRNA | 133 | 92 | AATATTGCGAGAAAACCTCTTAGAATTGATAGAAGACAGTCCTGGCGGGATTCCAATAGAACTGT<br>TAAGCTTCTAACCTTTCAGATGCTTCGTGGTGTGCAATTTTTGTGGGAGTTTCATGGAGATATGTCA                                                                                                                                  | (6)         |
| <b>U5 RNA</b>                                              | Candidate<br>spliceosomal RNA | ncRNA | 105 | 85 | ACAACCTGCAGATCATTTCATCTCTGCGGTGGATGTATCTATCTGGTACGAGATATGTTGGGAGAGG<br>AAATGGCAGACAGTTGCATTTTTTGGGGTTATGGGCTG                                                                                                                                                             | (6)         |
| <b>U6 RNA</b>                                              | Candidate<br>spliceosomal RNA | ncRNA | 117 | 75 | GAAGTGTCGGGAACAAGTGAGGCCTGCACCTTTCTGCAAAACAGAGGAAGTTCAAGCTGTTTCGTGCA<br>TTGAGTATATTACTACAGAGTCGTGGTACTCAGACCCTACAGTGTCTCT                                                                                                                                                 | (6)         |

## References:

1. [Combined experimental and computational approach to identify non-protein-coding RNAs in the deep-branching eukaryote \*Giardia intestinalis\*.](#)

Chen XS, Rozhdestvensky TS, Collins LJ, Schmitz J, Penny D.  
Nucleic Acids Res. 2007;35(14):4619-28. Epub 2007 Jun 22.  
PMID: 17586815

2. [Identification of 20 snoRNA-like RNAs from the primitive eukaryote, \*Giardia lamblia\*.](#)

Yang CY, Zhou H, Luo J, Qu LH.  
Biochem Biophys Res Commun. 2005 Mar 25;328(4):1224-31.  
PMID: 15708007

3. [Characterization of putative small nuclear RNAs from \*Giardia lamblia\*.](#)

Niu XH, Hartshorne T, He XY, Agabian N.  
Mol Biochem Parasitol. 1994 Jul;66(1):49-57.  
PMID: 7527125

4. Identification and evolutionary implication of four novel box H/ACA snoRNAs from *Giardia lamblia*.

Luo J, Zhou H, Chen CJ, Li Y, Chen YQ, Qu LH.  
Chin. Sci. Bull. (2006) 51:2451–2456

5. [Structural implications of novel diversity in eucaryal RNase P RNA.](#)

Marquez SM, Harris JK, Kelley ST, Brown JW, Dawson SC, Roberts EC, Pace NR.  
RNA. 2005 May;11(5):739-51. Epub 2005 Apr 5.  
PMID: 15811915

6. [Computational identification of four spliceosomal snRNAs from the deep-branching eukaryote \*Giardia intestinalis\*.](#)

Chen XS, White WT, Collins LJ, Penny D.  
PLoS ONE. 2008 Aug 29;3(8):e3106.  
PMID: 18769729
